# Supplementary material for: Surface chemistry in atomic layer deposition of AlN thin films from Al(CH3)3 and NH3 studied by mass spectrometry
Source: Royal Society of Chemistry journal article supplement (doi:10.1039/d4tc01867b), 2024-01-01
Supplement: d4tc01867b1.pdf [file d4tc01867b1.pdf]

Supporting information for:

## Surface chemistry in atomic layer deposition of AlN thin films from Al(CH<sub>3</sub>)<sub>3</sub> and NH<sub>3</sub> studied by mass spectrometry

Pamburayi Mpofu<sup>1</sup>, Houyem Hafdi<sup>1</sup>, Pentti Niiranen<sup>1</sup>, Jonas Lauridsen<sup>2</sup>, Oscar Alm<sup>2</sup>, Tommy Larsson<sup>2</sup>, Henrik Pedersen<sup>1\*</sup>

<sup>1</sup>Department of Physics, Chemistry and Biology, Linköping University, SE-581 83, Linköping, Sweden

<sup>2</sup>Seco Tools AB, SE-737 82, Fagersta, Sweden

\*Corresponding author: [henrik.pedersen@liu.se](mailto:henrik.pedersen@liu.se)

### Stoichiometry of deposited films

Elemental composition of the deposited films was measured by XPS. The measurements show close to 1:1 Al:N stoichiometry for both processes, with ± 5% error bar. [Table S1](#) summarizes the elemental composition from XPS after 600 s of sputter cleaning.

*Table S1: Overview of optimized process parameters and film stoichiometry from XPS.*

| Process     | TMA pulse time (s) | NH <sub>3</sub> pulse time (s) | Deposition temperature (°C) | Al (at.%) | N (at.%) | O (at.%) | C (at.%) | Al:N ratio |
|-------------|--------------------|--------------------------------|-----------------------------|-----------|----------|----------|----------|------------|
| TMA plasma  | 0.1                | 12                             | 300                         | 49.5      | 47.6     | 1.2      | 1.7      | 1:0.96     |
|             | 0.1                | 12                             | 400                         | 47.9      | 44.6     | 4.1      | 3.4      | 1:0.93     |
| TMA thermal | 0.1                | 18                             | 350                         | 47.5      | 45.3     | 4.4      | 2.8      | 1:0.95     |
|             | 0.1                | 18                             | 400                         | 48.6      | 44.4     | 3.6      | 3.4      | 1:0.91     |

Verification of Al-N bonding in the film was also done using XPS. Characteristic peaks of Al-N at 74.1 eV in Al 2p core level spectra can be seen in Fig. S1, for plasma ALD ([Fig. S1a](#)) and thermal ALD ([Fig. S1b](#)).<sup>1</sup> An additional peak, assigned to metallic Al can be seen at 72.8 eV (plasma) and 72.5 eV (thermal),<sup>2</sup> which are attributed to ion induced sputtering effects when sputtering the XPS.<sup>3</sup>

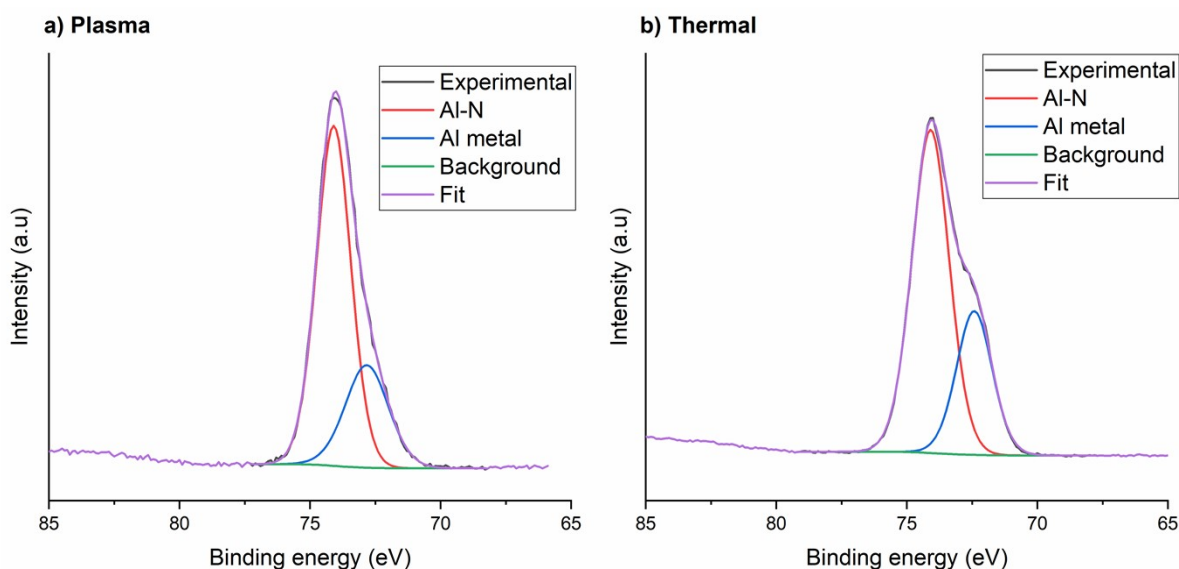

**Figure S1:** High resolution XPS of Al 2p core level spectra for the plasma process (a) deposited at 300 °C and thermal process (b) deposited at 350 °C.

### Crystallinity of deposited films

The crystallinity of the deposited AlN films was investigated using  $\theta$ -2 $\theta$  XRD. Fig. S2 shows that all three peaks for both the plasma and thermal processes which are in good agreement with the (100), (002), and (101) peaks of wurtzitic AlN (ICSD no. 01-070-0354). The films are thus suggested to be polycrystalline with no preferred orientation or texture.

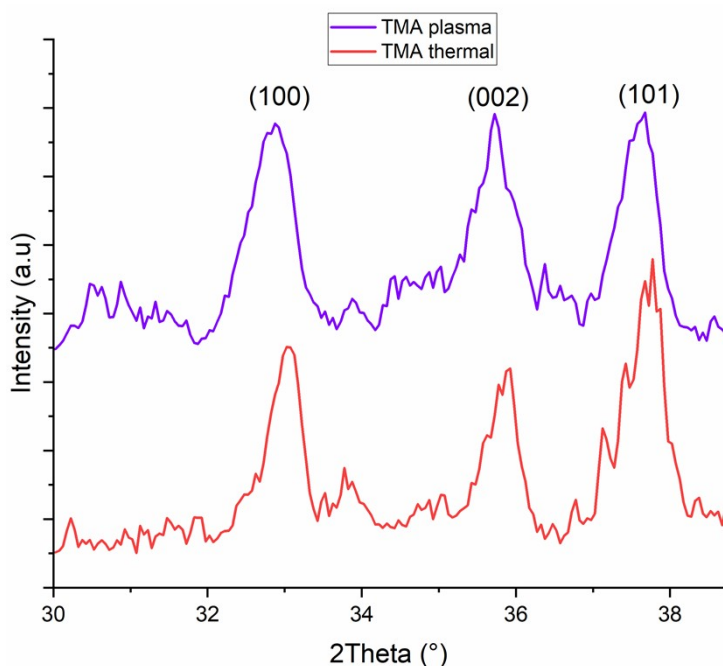

**Figure S2:** X-ray diffraction patterns of plasma and thermal processes deposited at 300 and 350 °C respectively.

## Arrhenius plots

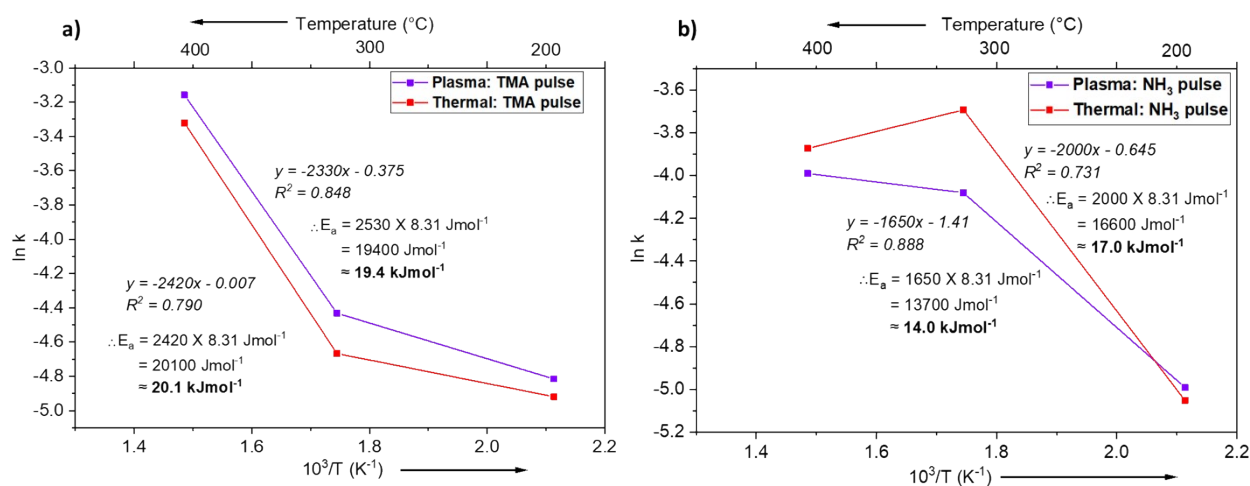

**Figure S3.** Arrhenius plots used to approximate the activation energies for the methane evolution during TMA pulses (a) and  $NH_3$  pulses (b).

## Nucleation delays

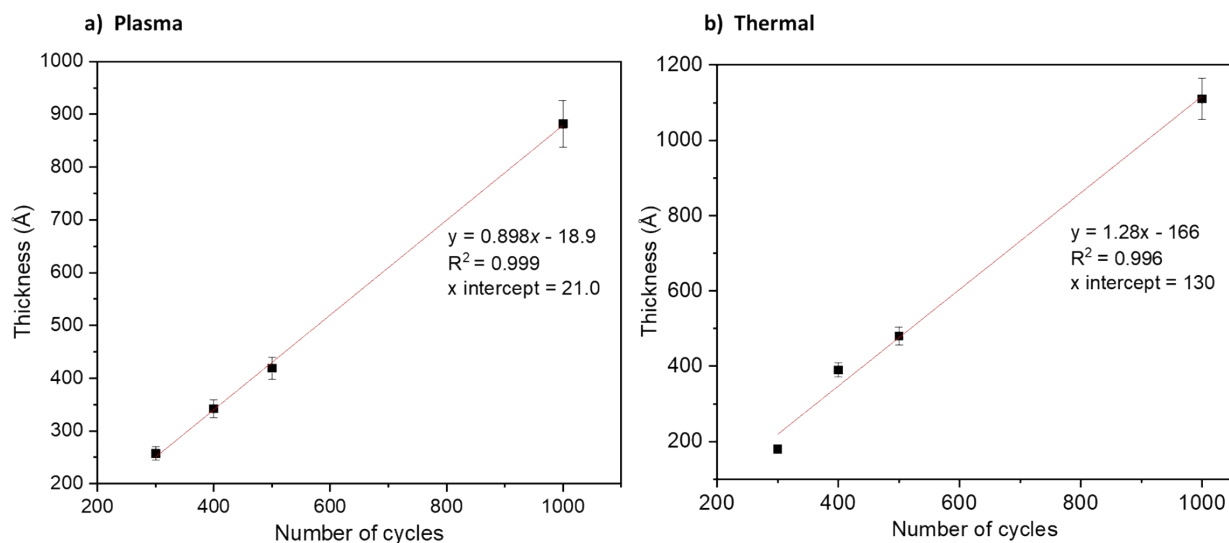

**Figure S4:** Nucleation delays between plasma (a) and thermal (b) processes showing that 21 and 130 ALD cycles (x-intercept values) are needed, respectively, for nucleation and film growth to begin.

## References

- (1) Jose, F.; Ramaseshan, R.; Dash, S.; Bera, S.; Tyagi, A. K.; Raj, B. Response of Magnetron Sputtered AlN Films to Controlled Atmosphere Annealing. *J. Phys. D. Appl. Phys.* **2010**, *43*, 075304.
- (2) Hoque, E.; Derosé, J. A.; Kulik, G.; Hoffmann, P.; Mathieu, H. J.; Bhushan, B. Alkylphosphonate Modified Aluminum Oxide Surfaces. *J. Phys. Chem. B* **2006**, *110*, 10855–10861.
- (3) Xie, F. Y.; Gong, L.; Liu, X.; Tao, Y. T.; Zhang, W. H.; Chen, S. H.; Meng, H.; Chen, J. XPS Studies on Surface Reduction of Tungsten Oxide Nanowire Film by Ar + Bombardment. *J. Electron Spectros. Relat. Phenomena* **2012**, *185*, 112–118.
